# Supplementary material
Source: PubMed Central journal article supplement (PMC9348368)

## SUPPLEMENTAL MATERIALS

**Supplementary Table S1 – The variance inflation factor (VIF) values of the independent variables and covariates in the logistic regression model**

| Variable                                  | VIF  | SQRT VIF | Tolerance | R-Squared |
|-------------------------------------------|------|----------|-----------|-----------|
| Sex                                       | 1.05 | 1.02     | 0.95      | 0.05      |
| Race                                      | 1.48 | 1.22     | 0.68      | 0.32      |
| Age                                       | 1.38 | 1.17     | 0.73      | 0.27      |
| Income                                    | 1.60 | 1.26     | 0.63      | 0.37      |
| Metro                                     | 1.04 | 1.02     | 0.96      | 0.04      |
| Region                                    | 1.02 | 1.01     | 0.98      | 0.02      |
| Dual                                      | 1.73 | 1.32     | 0.58      | 0.42      |
| Speak Language Other than English at Home | 1.43 | 1.20     | 0.70      | 0.30      |
| Weak Immune System                        | 1.08 | 1.04     | 0.93      | 0.07      |
| Hypertension                              | 1.17 | 1.08     | 0.85      | 0.15      |
| High Cholesterol                          | 1.14 | 1.07     | 0.88      | 0.12      |
| Stroke                                    | 1.05 | 1.02     | 0.95      | 0.05      |
| Cancer                                    | 1.03 | 1.02     | 0.97      | 0.03      |
| Lung Diseases                             | 1.07 | 1.03     | 0.94      | 0.06      |
| Diabetes                                  | 1.13 | 1.06     | 0.89      | 0.11      |
| Heart Diseases                            | 1.12 | 1.06     | 0.89      | 0.11      |
| Depression                                | 1.16 | 1.08     | 0.86      | 0.14      |
| Dementia                                  | 1.06 | 1.03     | 0.95      | 0.05      |
| Main Information Source                   | 1.02 | 1.01     | 0.98      | 0.02      |
| Suspected to Have CV19                    | 1.66 | 1.29     | 0.60      | 0.40      |
| Was Told They Have CV19                   | 3.77 | 1.94     | 0.27      | 0.73      |
| Tested for CV19                           | 1.14 | 1.07     | 0.88      | 0.12      |
| Result of Active CV19                     | 3.79 | 1.95     | 0.26      | 0.74      |
| Mean VIF                                  | 1.44 |          |           |           |

**Supplementary Figure S1 – The conceptual framework based on Anderson’s Behavioral Model of Healthcare Utilization and the corresponding components**

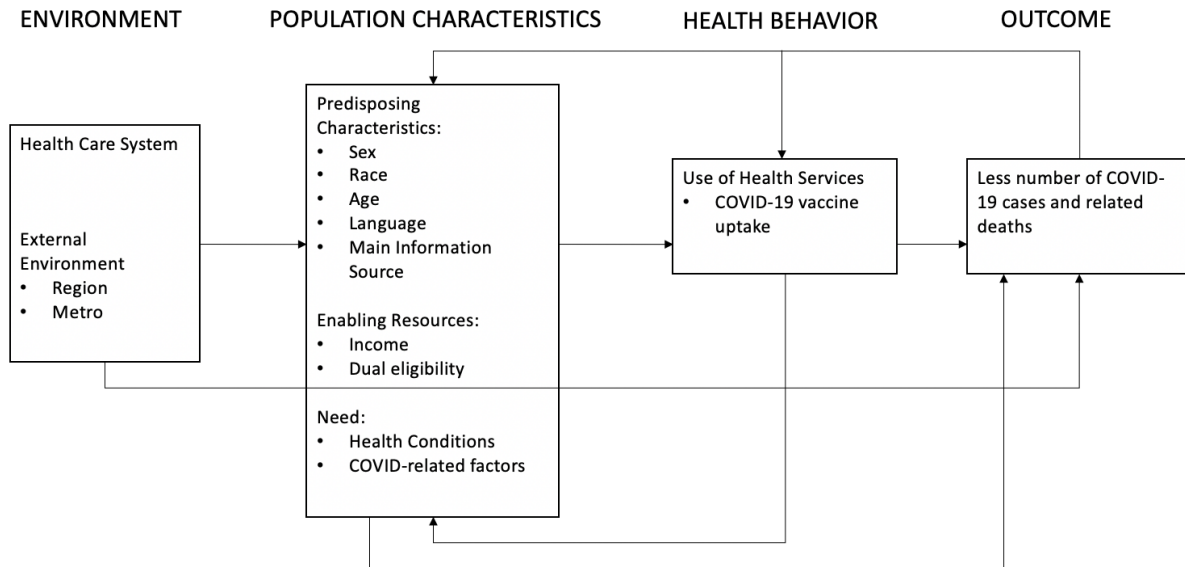

Supplement: JGS-9999-0-s001.pdf [file JGS-9999-0-s001.pdf]
